# Supplementary material
Source: publisher site journal article supplement (https://www.dovepress.com/article/443117)

**Supplementary Table 1:** The primers used for analysis of gene expression using qPCR.

| **Gene of interest** | **Primers** |
| --- | --- |
| ULK1 | FP: 5’ GGCAAGTTCGAGTTCTCCCG 3’  RP: 5’ CGACCTCCAAATCGTGCTTCT 3’ |
| ATG3 | FP: 5’ GGCGGATGGGTAGATACATAT 3’  RP: 5’ GCTTCTCCTTCATCTTCATCTTC 3’ |
| ATG5 | FP: 5’ GATACCAGAGGGCGGAAGTG 3’  RP: 5’GTAGCAGGACTCCAGGAAGC 3’ |
| LC3II | FP: 5’ CCGCCACCTTTTTGGGTAGA 3’  RP: 5’ CCGTTTACCCTGCGTTTGTG 3’ |
| NF-κB1 | FP: 5’ AACAGAGAGGATTTCGTTTCCG 3’  RP: 5’ TTTGACCTGAGGGTAAGACTTCT 3’ |
| NF-κB2 | FP: 5’ ATGAAGATTGAGCGGCCTGT 3’  RP: 5’ GCACCTCTTCCTTGTCTTCCA 3’ |
| p53 | FP: 5’ GCTGCTCAGATAGCGATGGTC 3’  RP: 5’ CTCCCAGGACAGGCACAAACA 3’ |
| E-cadherin | FP: 5’ CCAGTGAACAACGATGGCATT 3’  RP: 5’ TGCTGCTTGGCCTCAAAAT 3’ |
| SNAIL | FP: 5’ CCCCAATCGGAAGCCTAACT 3’  RP: 5’ GCTGGAAGGTAAACTCTGGATTAGA 3’ |
| Vimentin | FP: 5’ TCCAAACTTTTCCTCCCTGAAC 3’  RP: 5’ GGGTATCAACCAGAGGGAGTGA 3’ |
| β-actin | FP: 5’ GGTCATCACCATTGGCAATGAG 3’  RP: 5’ TACAGGTCTTTGCGGATGTCC 3’ |

**Supplementary Table 2A:** The drug release at varying time intervals at pH 5.5 are as follows:

| **Time (Hours)** | **Release (%)** |
| --- | --- |
| 18 | 3.003003 |
| 18.5 | 7.132132 |
| 19 | 15.39039 |
| 19.5 | 23.27327 |
| 20 | 31.15616 |
| 20.5 | 46.54655 |
| 21 | 53.67868 |
| 21.5 | 62.68769 |
| 22 | 69.44444 |
| 22.5 | 75.45045 |
| 23 | 82.95796 |
| 23.5 | 87.08709 |
| 24 | 88.58859 |

**Supplementary Table 2B:** The drug release at varying time intervals at pH 7.4 are as follows:

| **Time (Hours)** | **Release (%)** |
| --- | --- |
| 72 | 1.97366 |
| 75 | 9.21058 |
| 78 | 15.46067 |
| 81 | 25.65809 |
| 84 | 35.19744 |
| 87 | 43.75009 |
| 90 | 57.5659 |
| 93 | 67.76329 |
| 96 | 75.65784 |
| 97 | 79.93427 |
| 98 | 84.53981 |
| 99 | 88.81575 |
| 100 | 90.78941 |
| 101 | 91.11852 |
| 102 | 91.44762 |

**Supplementary Figure 1A:** UPLC based determination of standard rutin.

**
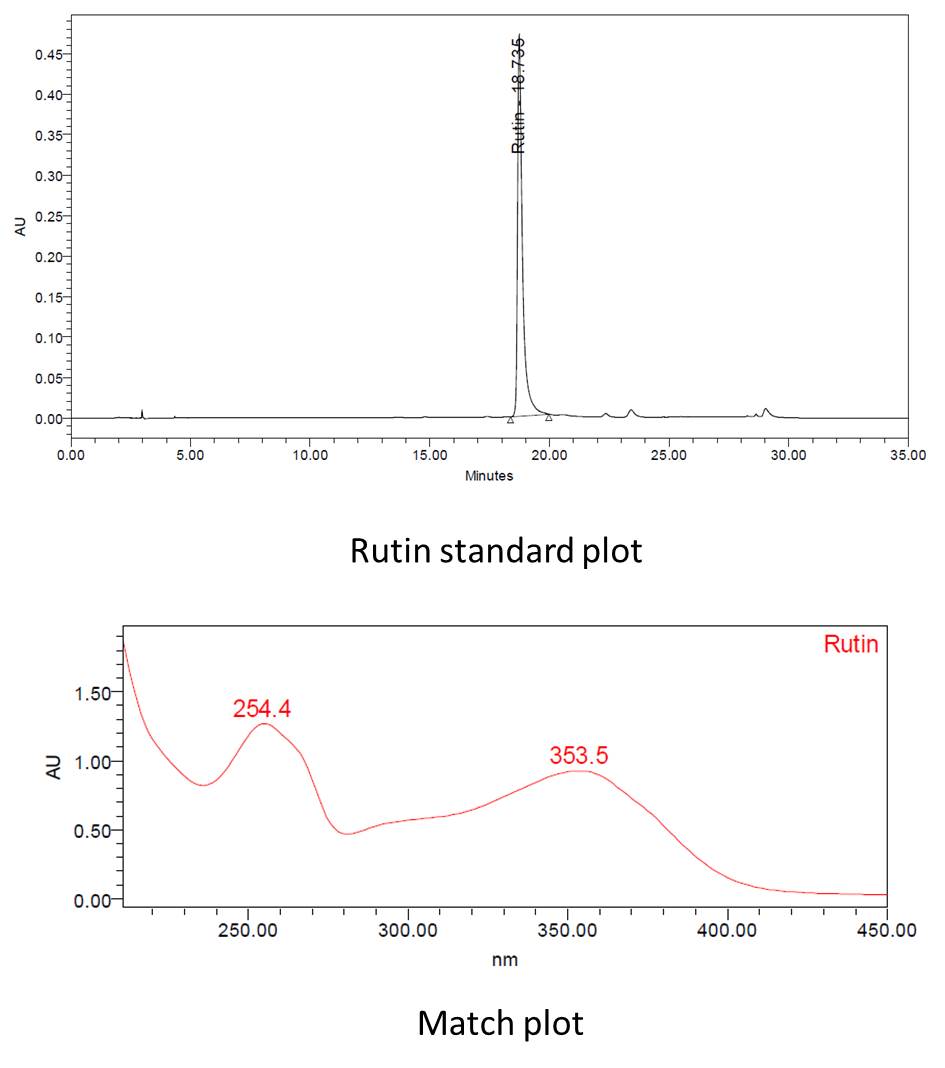
**

**Supplementary Figure 1B:** UPLC based quantification of rutin load on CNPs.

**
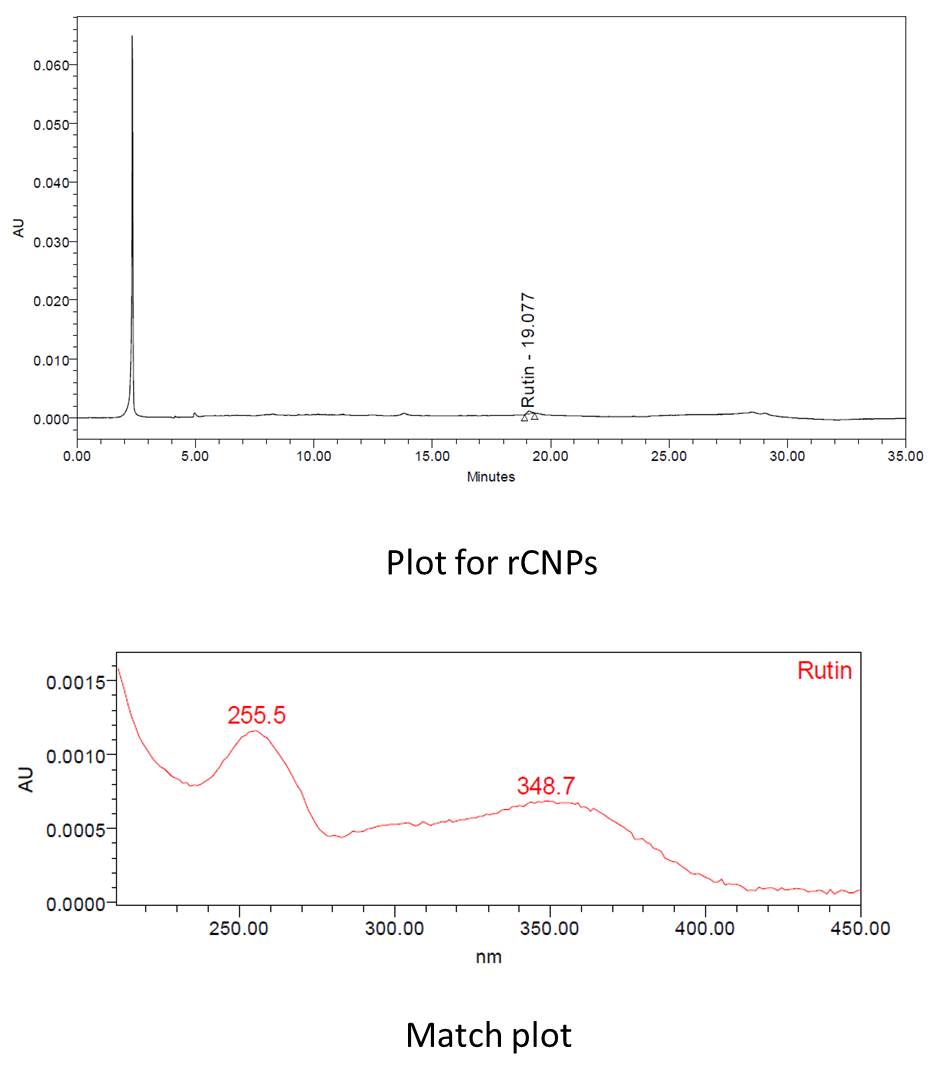
**

**Supplementary Figure 2A:** Microscopic observations of the cytotoxic effects of rCNPs filtered using a 0.22 micron filter on Hep3B cells.


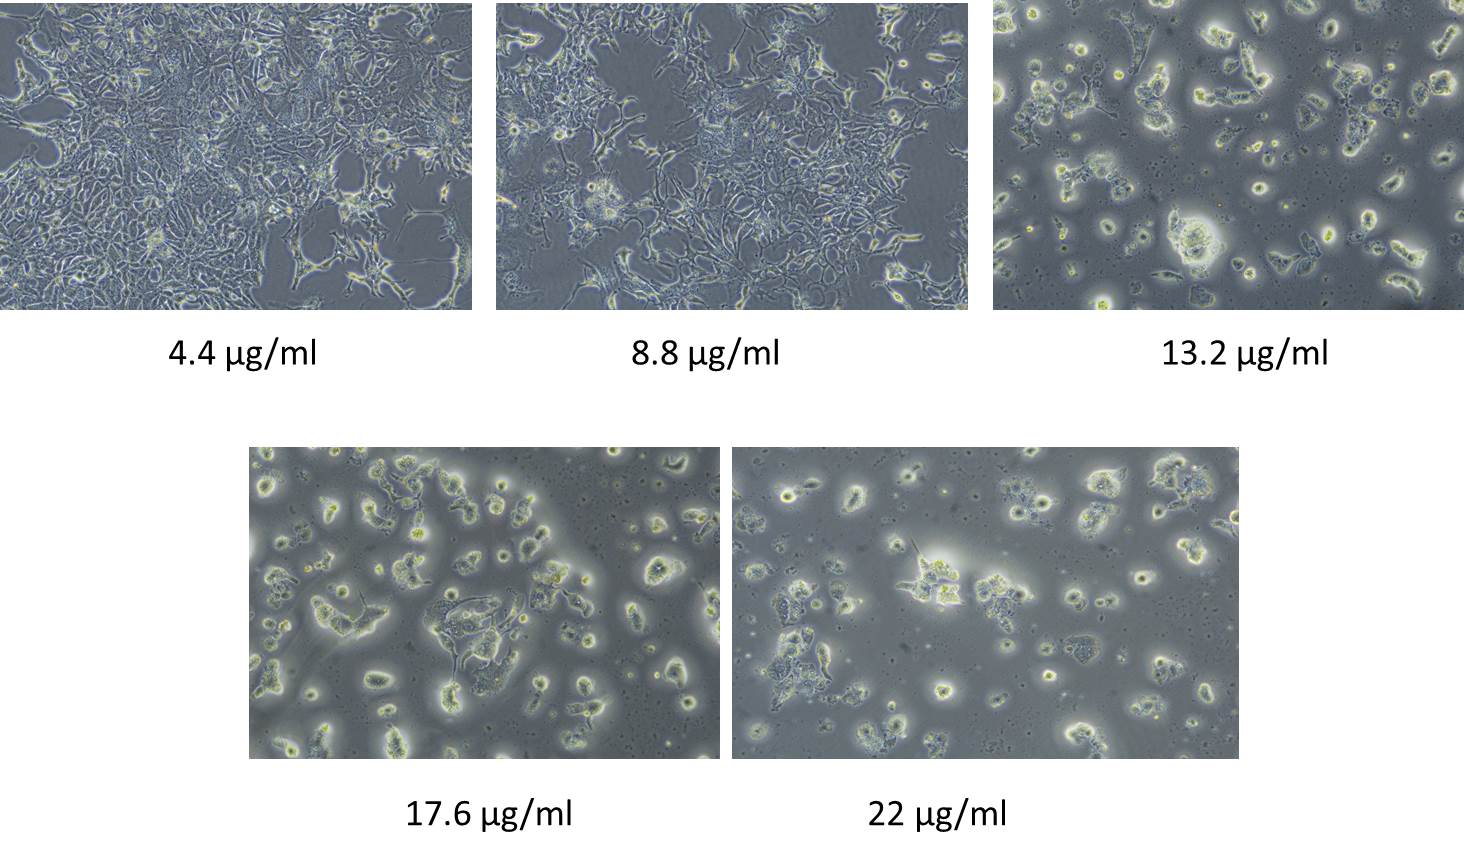


**Supplementary Figure 2B:** Microscopic observations of the cytotoxic effects of the pCNPs on Hep3B cells.


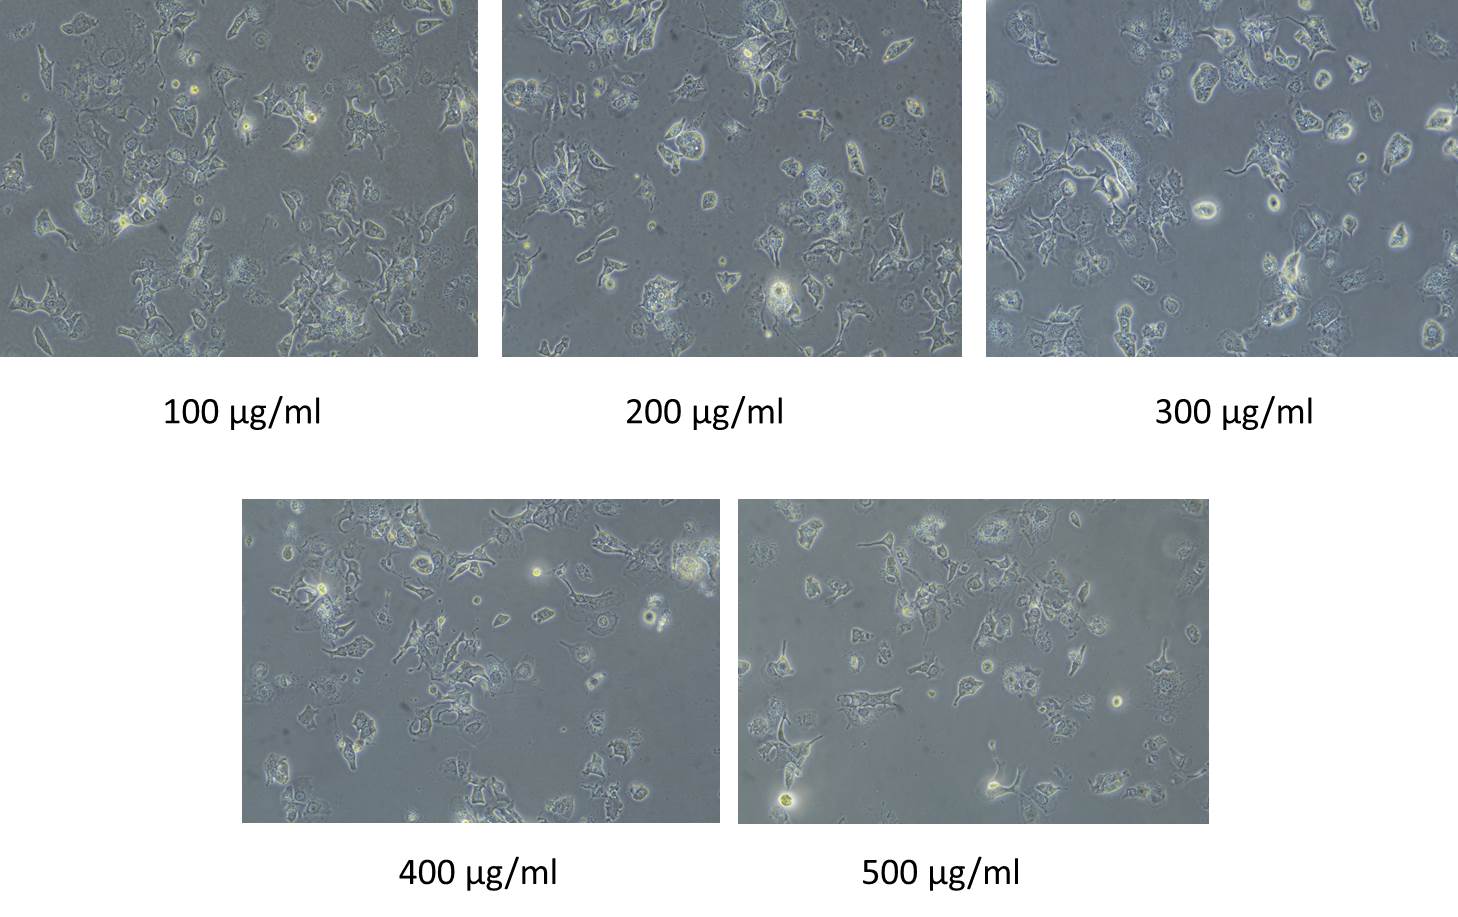


**Supplementary Figure 3:** Microscopic observations of interactions between rCNPs and L929 fibroblasts.


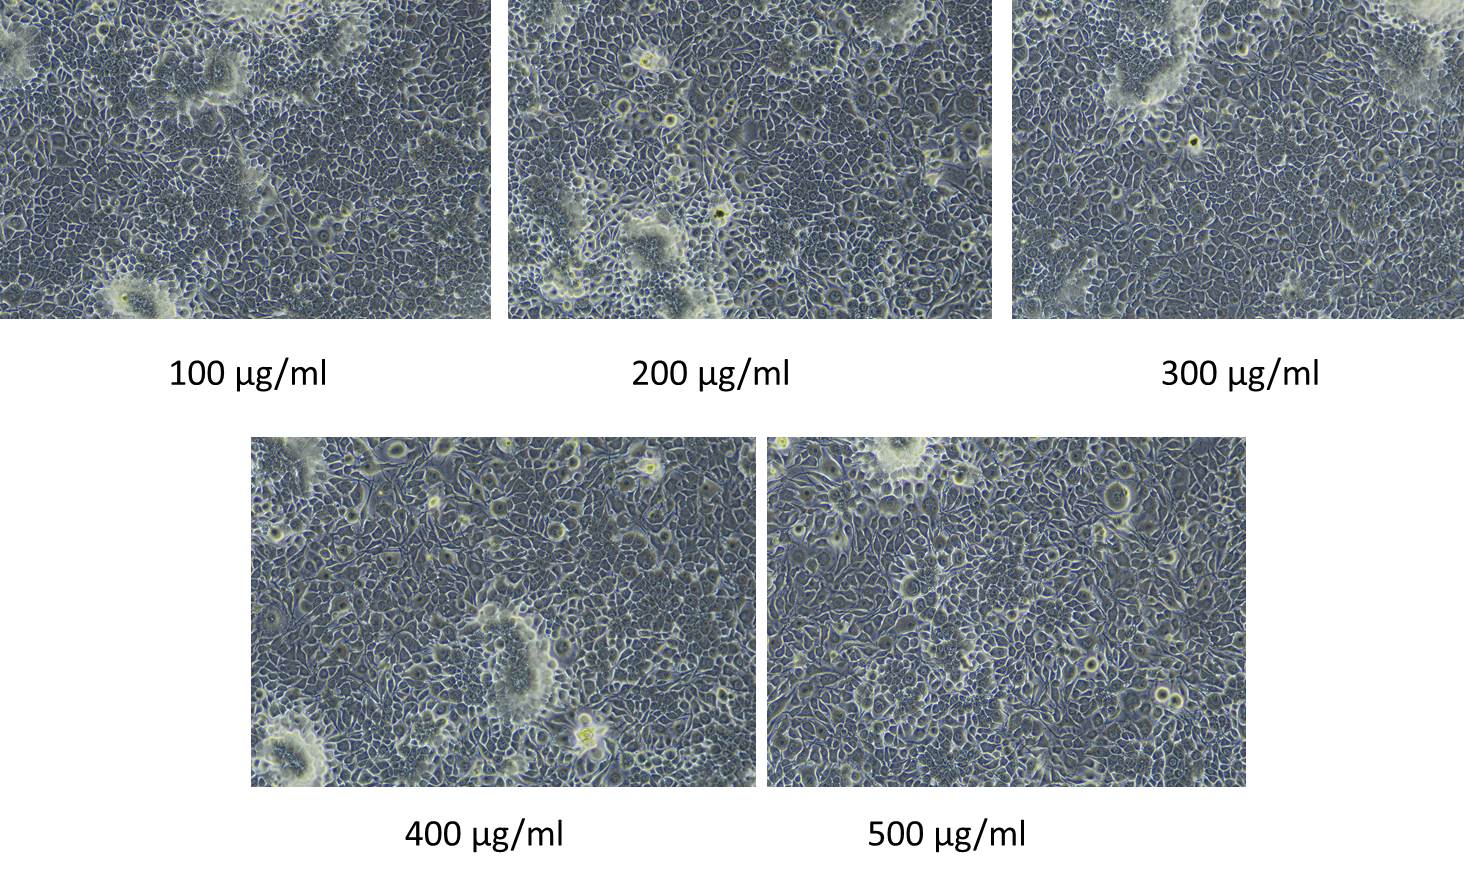

Supplement: Supplementary file 1 [file get_supplementary_file.php]
